# Supplementary material for: A study on the synthesis, longitudinal optical phonon–plasmon coupling and electronic structure of Al doped ZnS nanorods
Source: Royal Society of Chemistry journal article supplement (doi:10.1039/c6ra28180j), 2017-01-01
Supplement: c6ra28180j1.pdf [file c6ra28180j1.pdf]

## A study on synthesis, longitudinal optic phonon-plasmon coupling and density function theory of Al doped ZnS nanorods†

Received 00th January 20xx,  
Accepted 00th January 20xx

U. P. Gawai <sup>a</sup>, U. P. Deshpande<sup>b</sup> and B. N. Dole\*<sup>a</sup>

DOI: 10.1039/x0xx00000x

[www.rsc.org/](http://www.rsc.org/)

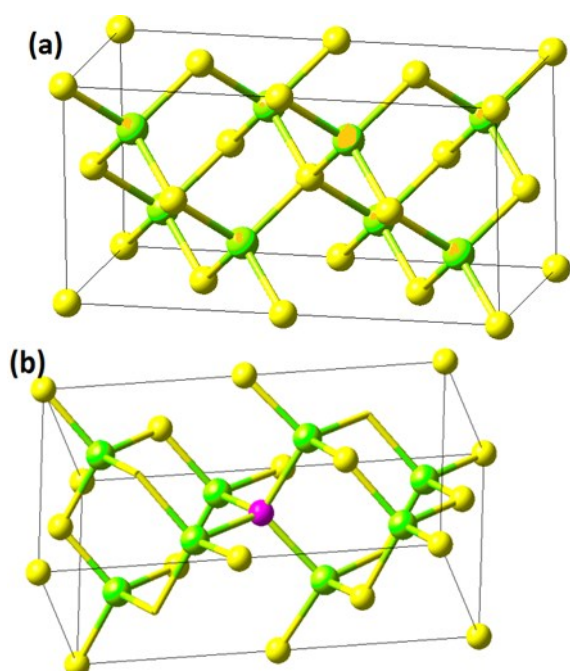

**Fig. S1** Supercell of (a) pure ZnS and (b) Al doped ZnS nanorods. The lime, yellow and blue colour represent Zn, S and Al atom respectively.

<sup>a</sup> Advanced Materials Research Laboratory, Department of Physics, Dr. Babasaheb Ambedkar Marathwada University, Aurangabad-431 004, India. Email: [drbndole.phy@gmail.com](mailto:drbndole.phy@gmail.com).

<sup>b</sup> UGC-DAE Consortium for Scientific Research, University Campus, Khandwa Road, Indore-425 017, India.
